# Supplementary material
Source: PubMed Central journal article supplement (PMC1283793)
Supplement: pnas_0502281102_3.pdf [file pnas_0502281102_3.pdf]

**Table 3. Microsatellite DNA allele frequencies at nine loci from modern and ancient populations of Adélie penguins from Inexpressible Island**

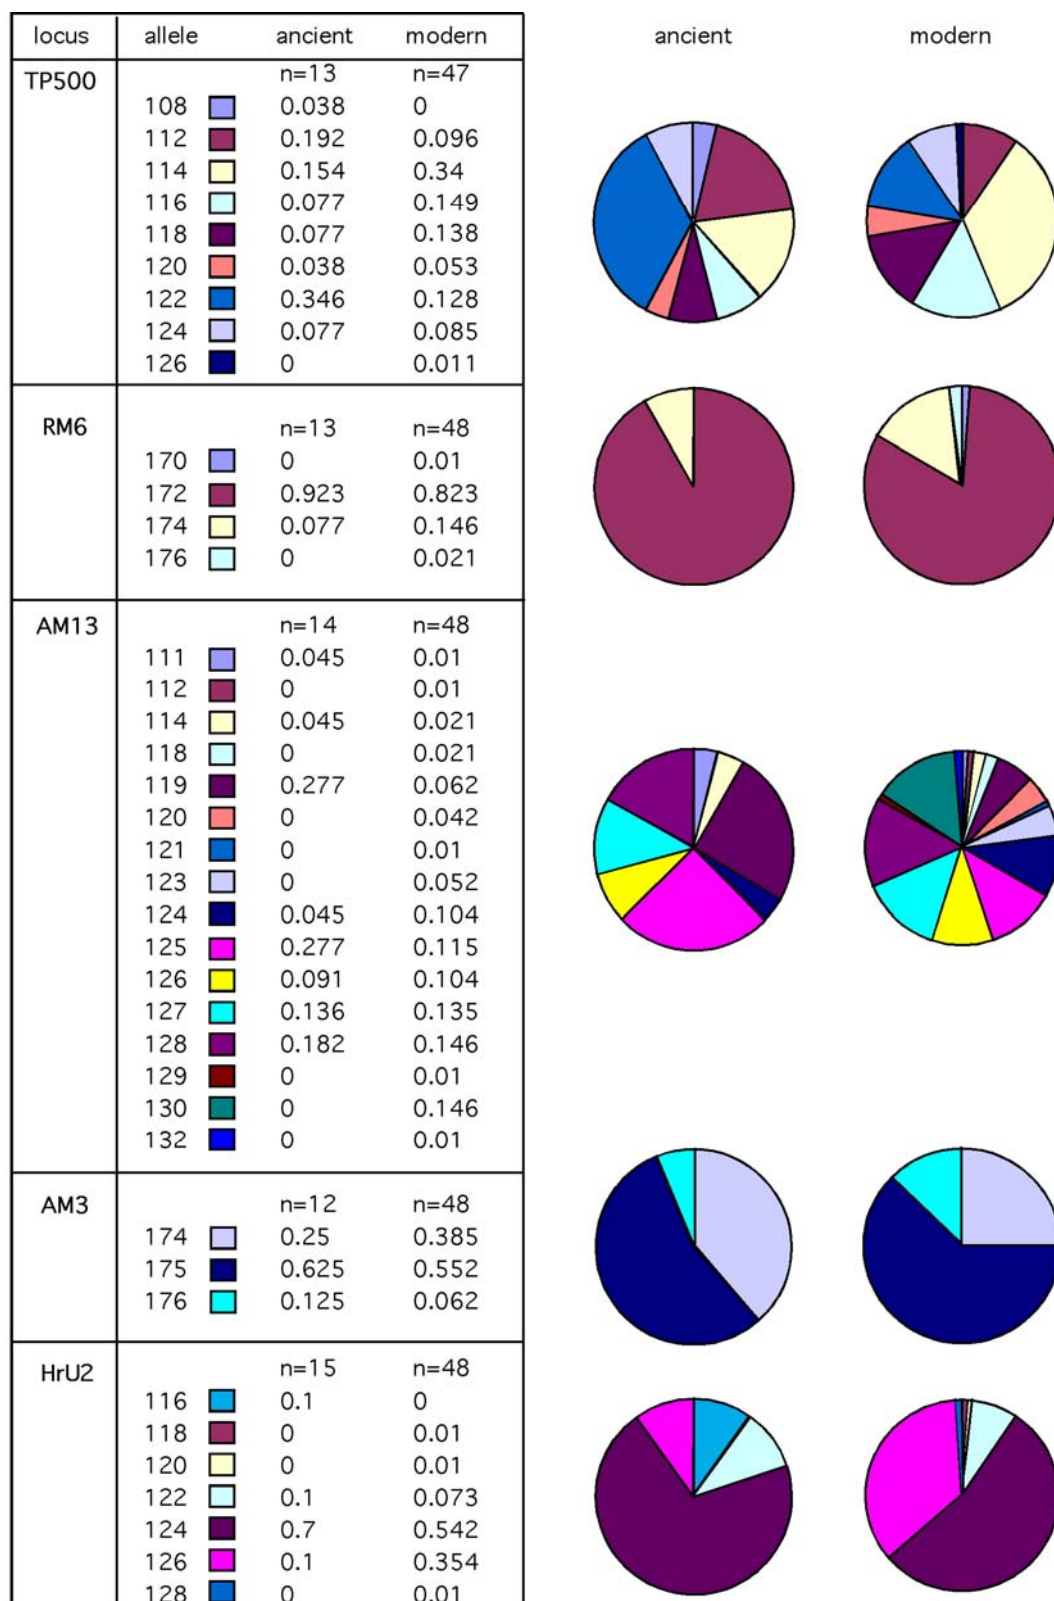

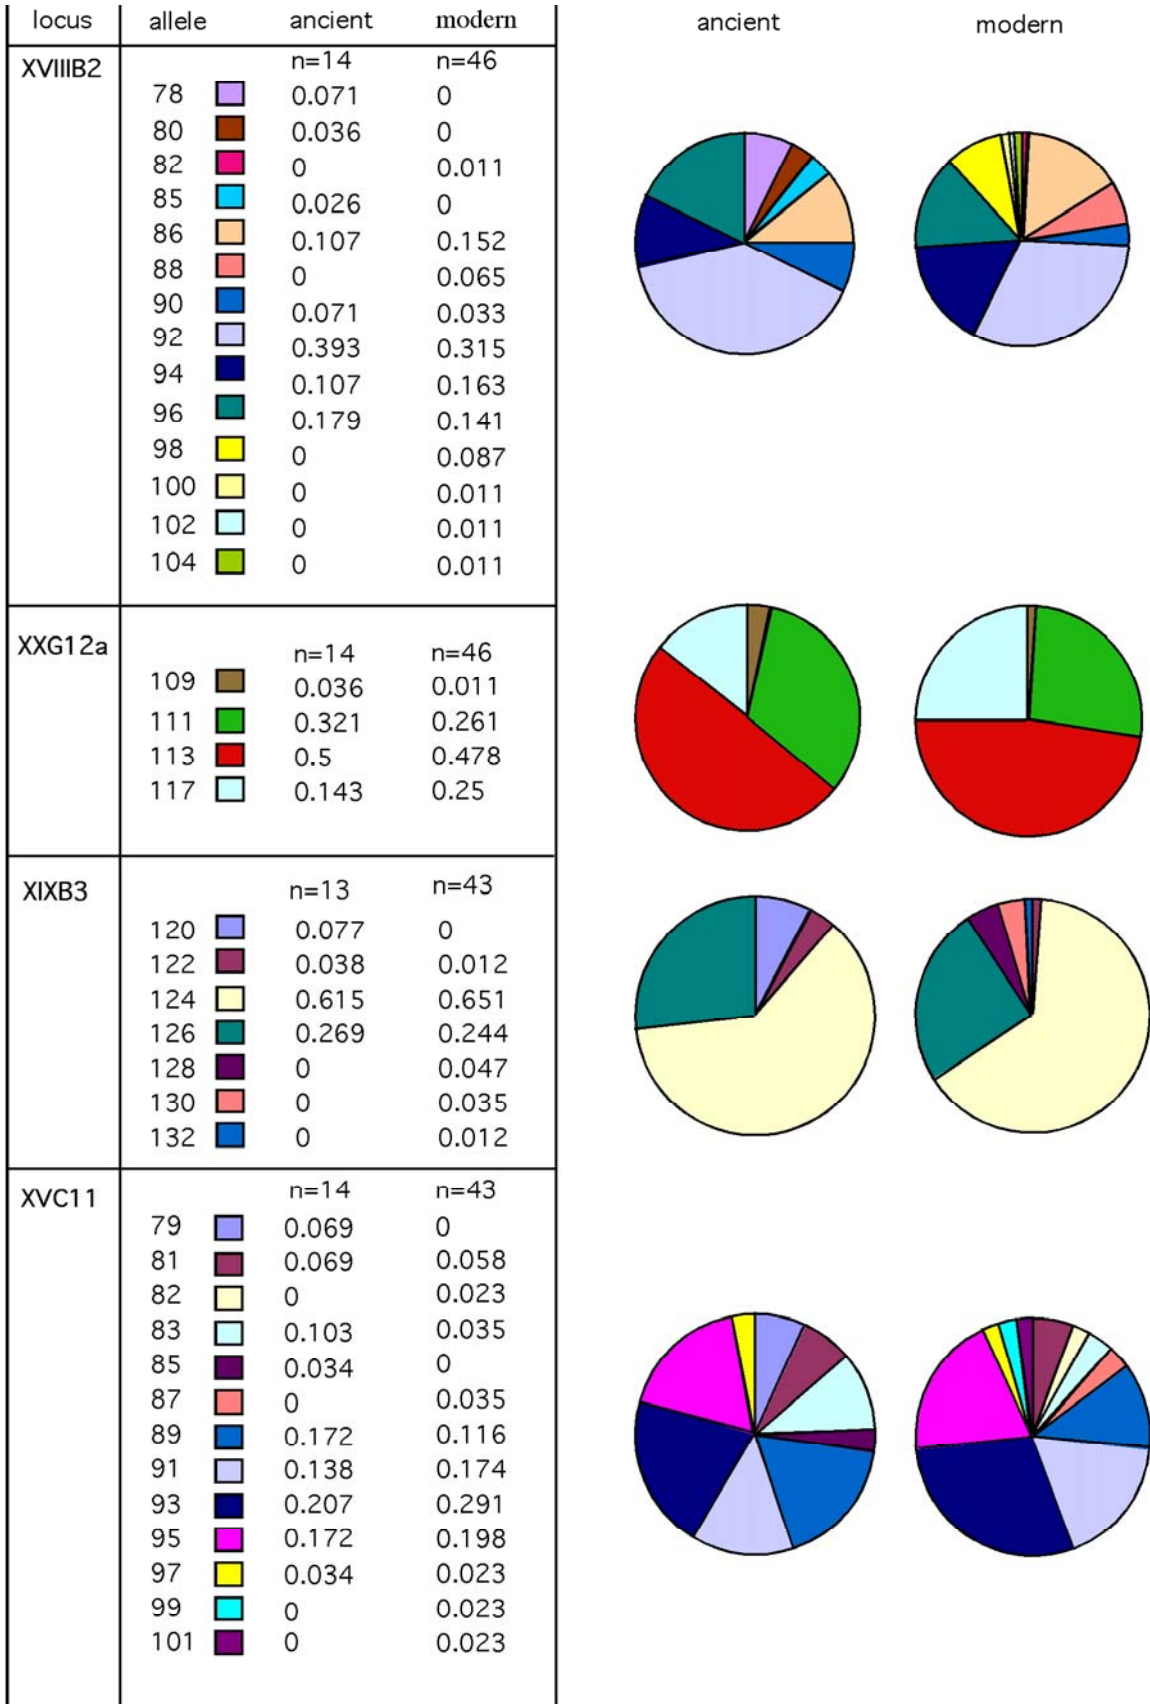

Pie diagrams show approximate allele frequencies.
