# Supplementary material
Source: PubMed Central journal article supplement (PMC1283793)

# ANTARCTICA

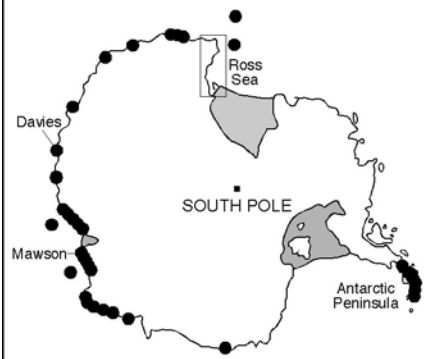

# ROSS SEA

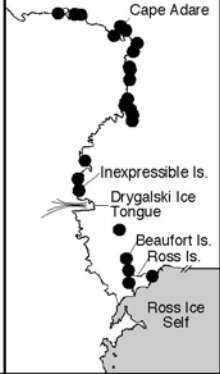

Supplement: pnas_0502281102_1.pdf [file pnas_0502281102_1.pdf]

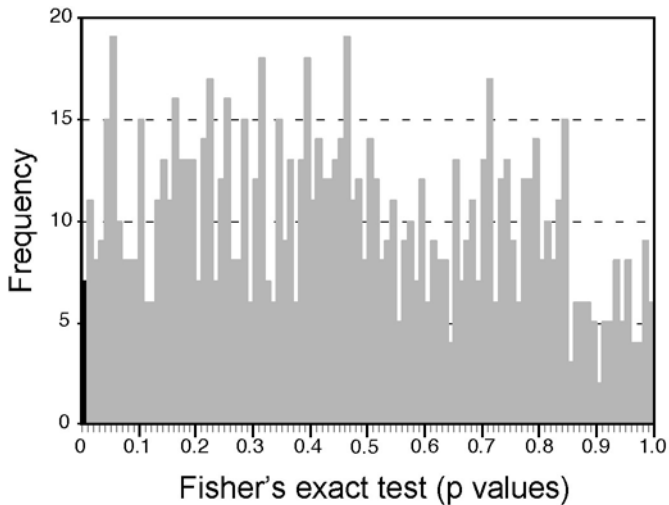

Supplement: pnas_0502281102_2.pdf [file pnas_0502281102_2.pdf]
